# Supplementary material for: Amyloid-β-Derived Peptidomimetics Inhibits Tau Aggregation
Source: PubMed Central journal article supplement — ACS Omega. 2021 Apr 22;6(17):11131–8. doi: 10.1021/acsomega.9b03497 (PMC8153954; doi:10.1021/acsomega.9b03497), 2021-04-22
Supplement: ao9b03497_si_001.pdf [file ao9b03497_si_001.pdf]

## Supplementary information

# Amyloid- $\beta$ -derived Peptidomimetics inhibits Tau aggregation

Nalini V. Gorantla,<sup>[a],[d]</sup> Lisni P sunny<sup>[a],[d]</sup>, Kolla Rajasekhar<sup>[c]</sup>, Pramod G Nagaraju,<sup>[b],[c]</sup>  
Poornima Priyadarshini CG<sup>[b],[c]</sup>, Thimmaiah Govindaraju<sup>[c]</sup> and Subashchandrabo  
se Chinnathambi<sup>\*,[a],[d]</sup>

<sup>a</sup>Neurobiology Group, Division of Biochemical Sciences, CSIR-National Chemical  
Laboratory,

Dr. Homi Bhabha Road, 411008 Pune, India.

<sup>b</sup>Department of Molecular Nutrition, CSIR-CFTRI, 570020 Mysore, India

<sup>c</sup>Bioorganic Chemistry Laboratory, New Chemistry Unit, Jawaharlal Nehru Centre  
for Advanced Scientific Research, Jakkur P.O., Bengaluru 560064, Karnataka, India

<sup>d</sup>Academy of Scientific and Innovative Research (AcSIR), 411008 Pune, India.

\*To whom correspondence should be addressed: **Prof. Subashchandrabo** **se Chinnathambi**,  
Neurobiology group, Division of Biochemical Sciences, CSIR-National Chemical Laboratory  
(CSIR-NCL), Dr. Homi Bhabha Road, 411008 Pune, India, Telephone: +91-20-25902232,  
Fax. +91-20-25902648. Email: [s.chinnathambi@ncl.res.in](mailto:s.chinnathambi@ncl.res.in)

**Synthesis of peptidomimetics and purification.** The control peptide (LPFFD) and N-methyl glycine (sarcosine: Sr) substituted peptidomimetics, P3 (Thymine-Lys-Leu-Val-Phe-Phe), P4 (Thymine-Sr-Leu-Sr-Phe-Sr-Ala), P5 (Thymine-Lys-Sr-Val-Sr-Phe-Sr) and P6 (Gly-His-Lys-Sr-Val-Sr-Phe-Sr) were synthesized following standard 9-fluorenylmethoxycarbonyl (Fmoc) chemistry on an automated peptide synthesizer from Syro II (MultiSynTech). Rink amide resin (Novabiochem) was used as a solid support for the peptidomimetic synthesis. Fmoc-protected sarcosine (Sr) was prepared and directly used for the synthesis of P4 and P5 in the peptide synthesizer. HBTU was used as coupling reagent for amino acids in presence of DIPEA with DMF as solvent. For deprotection of Fmoc, 40% piperidine in DMF was used. P3 and LPFFD were synthesized with a coupling time of 1 h per amino acid, whereas for P4, P5 and P6 coupling time was increased to 2 h to obtain higher coupling yields. All the peptides and peptidomimetics were purified using a reverse-phase preparative HPLC on the C18 column at 40°C. Product purity was greater than 98% as ascertained by analytical HPLC. The molecular masses of the peptides and their mimetics were verified with HRMS (Q-TOF) (Table 1).

**Table 1. HPLC and HRMS traces for P3, P4, P5, P6 and LPFFD**

| Name         | Sequence                             | Actual mass | Obtained mass [M+H] <sup>+</sup> |
|--------------|--------------------------------------|-------------|----------------------------------|
| <b>P3</b>    | <b>Thymine-</b> Lys-Leu-Val-Phe-Phe  | 818.4565    | 818.4581                         |
| <b>P4</b>    | <b>Thymine-Sr-</b> Leu-Sr-Phe-Sr-Ala | 728.3731    | 728.3716                         |
| <b>P5</b>    | <b>Thymine-</b> Lys-Sr-Val-Sr-Phe-Sr | 771.4153    | 771.4146                         |
| <b>P6</b>    | Gly-His-Lys-Sr-Val-Sr-Phe-Sr         | 821.4398    | 821.4391 [M+Na] <sup>+</sup>     |
| <b>LPFFD</b> | Lys-Pro-Phe-Phe-Asp                  | 637.3344    | 637.3348                         |

Sr = Sarcosine (N-methylglycine).

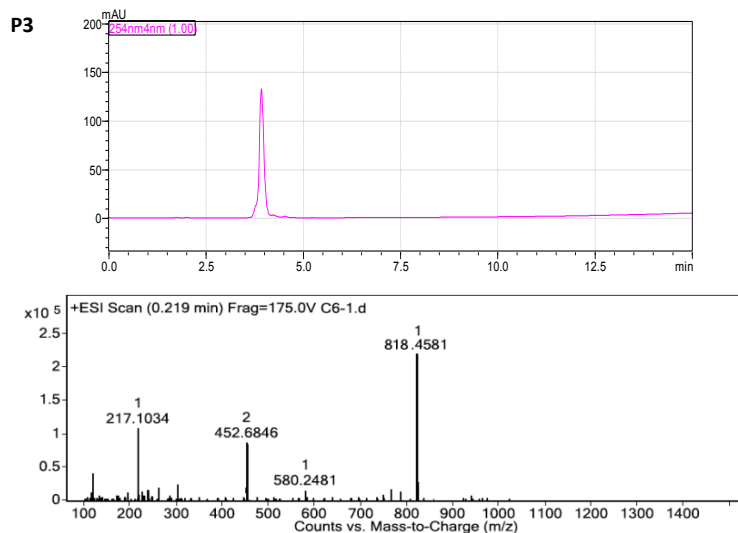

**Figure S1.** P3 was purified using a reverse-phase preparative HPLC on Shimadzu, using the Phenomenex, RP-C18 (5 $\mu$ m, 4.6  $\times$  250 mm) column. Water and acetonitrile was used as mobile phase at a ratio of 75:25 with 0.1% TFA v/v. The run was conducted by injecting 20  $\mu$ L peptide, a flow rate of 0.8 mL/min was maintained for 15 minutes run time.

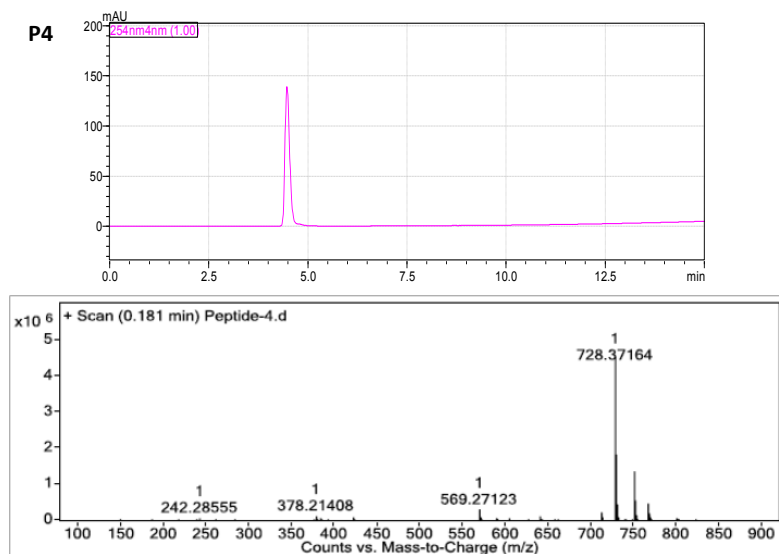

**Figure S2.** P4 was purified using a reverse-phase preparative HPLC on Shimadzu, using the Phenomenex, RP-C18 (5 $\mu$ m, 4.6  $\times$  250 mm) column. Water and acetonitrile was used as mobile phase at a ratio of 70:30 with 0.1% TFA v/v. The run was conducted by injecting 20  $\mu$ L peptide, a flow rate of 0.8 mL/min was maintained for 15 minutes run time.

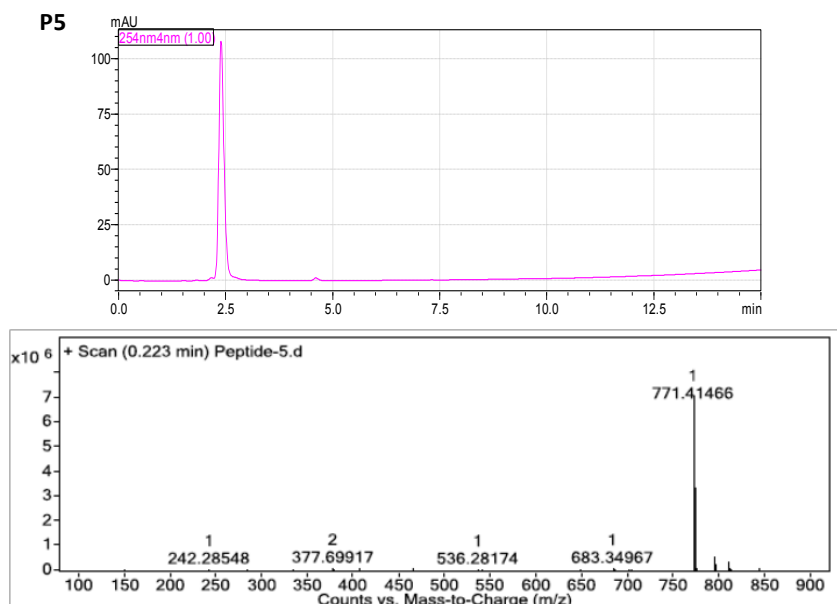

**Figure S3.** P5 was purified using a reverse-phase preparative HPLC on Shimadzu, using the Phenomenex, RP-C18 (5 $\mu$ m, 4.6  $\times$  250 mm) column. Water and acetonitrile was used as mobile phase at a ratio of 84:16 with 0.1% TFA v/v. The run was conducted by injecting 15  $\mu$ L peptide, a flow rate of 0.8 mL/min was maintained for 15 minutes run time.

**P6**

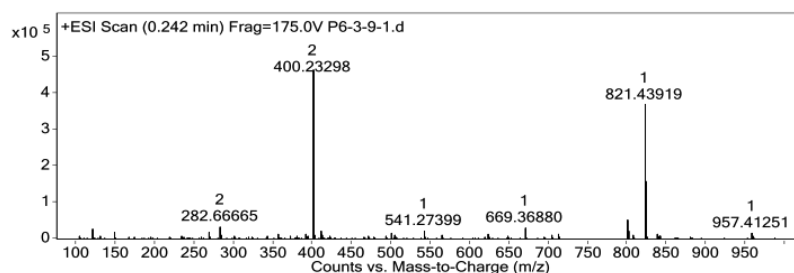

**Figure S4.** P6 was purified using a reverse-phase preparative HPLC on Shimadzu, using the Phenomenex, RP-C18 (5 $\mu$ m, 10  $\times$  250 mm) column. Water and acetonitrile was used as mobile phase at a ratio of 46:54 with 0.1% TFA v/v. The run was conducted by injecting 200  $\mu$ L peptide, a flow rate of 4 mL/min was maintained for 15 minutes run time.

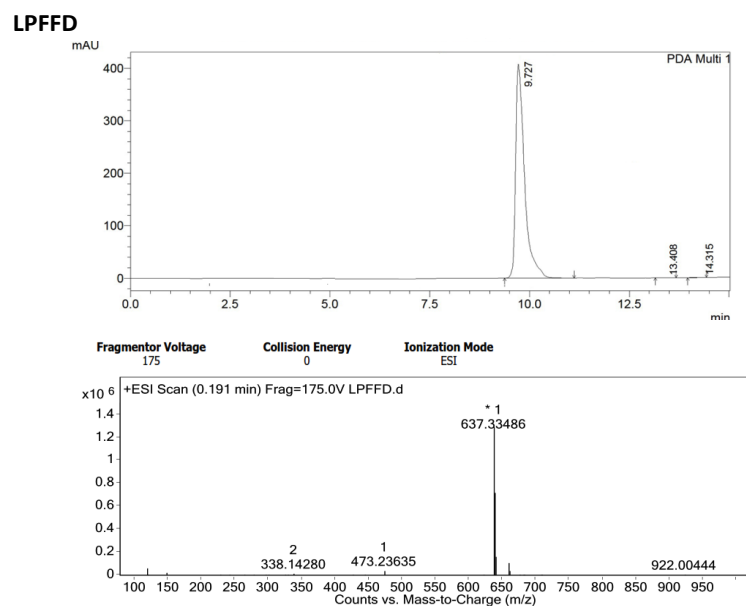

**Figure S5.** LPFFD was purified using a reverse-phase preparative HPLC on Shimadzu, using the Phenomenex, RP-C18 (5 $\mu$ m, 10  $\times$  250 mm) column. Water and acetonitrile was used as mobile phase at a ratio of 34:66 with 0.1% TFA v/v. The run was conducted by injecting 100  $\mu$ L peptide, a flow rate of 4 mL/min was maintained for 15 minutes run time.
